# Supplementary material
Source: Springer Nature journal article supplement (https://www.springermedizin.de/resource/supplementary/12960_2003_10_MOESM1_ESM.pdf/9569724)
Supplement: MOESM1 [file 9569724]

Motivating factor for  
health staff

```
graph TD; A[Motivating factor for health staff] --- B[HRM tools to influence staff motivation]; A --- C[Feedback from the community]; B --- C;
```

HRM tools to influence  
staff motivation

Feedback from  
the community
